# Supplementary material for: Factors Associated with Large Cup-to-Disc Ratio and Blindness in the Primary Open-Angle African American Glaucoma Genetics (POAAGG) Study
Source: MDPI journal article supplement (doi:10.3390/genes14091809), 2023-09-16
Supplement: s1 [file s1]

## Supplements

### Supplemental Table S1

Univariate analysis of demographic and clinical characteristics of eyes with and without LCDR.

| Characteristic                                           | Not Extreme CDR (n=4165 eyes) | Extreme CDR (n=1440 eyes) | Total (n=5,605) | Odds Ratio (95% CI) | P-value |
|----------------------------------------------------------|-------------------------------|---------------------------|-----------------|---------------------|---------|
| Age, mean (SD), years (OR per 10 yr increase)            | 69.5 (11.1)                   | 70.9 (11.9)               | 69.9 (11.4)     | 1.11(1.04-1.20)     | 0.003   |
| Age Group [%]                                            |                               |                           |                 |                     |         |
| <60                                                      | 746 (18.4%)                   | 255 (18.9%)               | 1001 (18.5%)    | Ref                 |         |
| [60,70]                                                  | 1237 (30.5%)                  | 338 (25.0%)               | 1575 (29.1%)    | 0.80(0.63-1.01)     |         |
| [70,80]                                                  | 1282 (31.6%)                  | 394 (29.1%)               | 1676 (31.0%)    | 0.90(0.72-1.13)     |         |
| >=80                                                     | 791 (19.5%)                   | 365 (27.0%)               | 1156 (21.4%)    | 1.35(1.06-1.71)     | <0.001  |
| Gender, n [%]                                            |                               |                           |                 |                     |         |
| Male                                                     | 1664 (40.0%)                  | 816 (56.7%)               | 2480 (44.2%)    | Ref                 |         |
| Female                                                   | 2501 (60.0%)                  | 624 (43.3%)               | 3125 (55.8%)    | 0.51(0.44-0.59)     | <0.001  |
| BMI, mean $\pm$ SD (OR per 1 unit increase)              | 30.1 (6.6)                    | 28.5 (6.5)                | 29.7 (6.6)      | 0.96(0.95-0.97)     | <0.001  |
| Diabetes, n (%)                                          | 1717 (43.3%)                  | 475 (35.4%)               | 2192 (41.3%)    | 0.72(0.61-0.84)     | <0.001  |
| Hypertension, n (%)                                      | 3144 (79.4%)                  | 1039 (77.2%)              | 4183 (78.9%)    | 0.88(0.73-1.06)     | 0.17    |
| Family history of glaucoma, n (%)                        | 2098 (57.0%)                  | 731 (59.4%)               | 2829 (57.6%)    | 1.11(0.94-1.30)     | 0.23    |
| Previous glaucoma surgery, n (%)                         | 819 (20.9%)                   | 641 (48.2%)               | 1460 (27.8%)    | 3.52(2.99-4.15)     | <0.001  |
| Tobacco use, n (%)                                       | 2027 (53.3%)                  | 732 (56.7%)               | 2759 (54.1%)    | 1.15(0.98-1.35)     | 0.09    |
| Alcohol use, n (%)                                       | 1943 (51.2%)                  | 626 (48.8%)               | 2569 (50.6%)    | 0.91(0.77-1.06)     | 0.22    |
| Ancestry (q0), mean $\pm$ SD (OR per 0.1 units increase) | 0.403 (0.302)                 | 0.374 (0.299)             | 0.395 (0.302)   | 0.97(0.94-1.00)     | 0.03    |

### Supplemental Table S2

Univariate analysis of optic disc characteristics of eyes with and without LCDR

| Characteristic             | Not Extreme CDR    | Extreme CDR      | Total              | Odds Ratio (95% CI) | P-value |
|----------------------------|--------------------|------------------|--------------------|---------------------|---------|
| Disc shape, n (%), total   |                    |                  |                    |                     |         |
| Round                      | 1068 (42.1%), 2539 | 390 (43.9%), 889 | 1458 (42.5%), 3428 | Ref                 |         |
| Oval                       | 1461 (57.5%), 2539 | 496 (55.8%), 889 | 1957 (57.1%), 3428 | 0.93(0.78-1.10)     |         |
| Other                      | 10 (0.4%), 2539    | 3 (0.3%), 889    | 13 (0.4%), 3428    | 0.82(0.22-3.09)     | 0.69    |
| Shape of cup, n (%), total |                    |                  |                    |                     |         |
| Conical                    | 1066 (43.6%), 2445 | 282 (33.7%), 838 | 1348 (41.1%), 3283 | Ref                 |         |
| Cylindrical                | 1184 (48.4%), 2445 | 282 (33.7%), 838 | 1466 (44.7%), 3283 | 0.90(0.74-1.10)     | <0.001  |

|                                                    |                    |                  |                    |                   |        |
|----------------------------------------------------|--------------------|------------------|--------------------|-------------------|--------|
| Bean Pot                                           | 183 (7.5%), 2445   | 272 (32.5%), 838 | 455 (13.9%), 3283  | 5.62(4.34-7.28)   |        |
| Other                                              | 12 (0.5%), 2445    | 2 (0.2%), 838    | 14 (0.4%), 3283    | 0.63(0.14-2.82)   |        |
| Beta peripapillary atrophy, n (%) total            | 422 (16.7%), 2520  | 191 (22.0%), 868 | 613 (18.1%), 3388  | 1.40(1.13-1.74)   | 0.002  |
| Stereoscopically identified disc tilt, n (%) total | 275 (10.9%), 2516  | 74 (8.5%), 870   | 349 (10.3%), 3386  | 0.76(0.56-1.02)   | 0.07   |
| Disc hemorrhage, n (%) total                       | 47 (1.9%), 2536    | 13 (1.5%), 877   | 60 (1.8%), 3413    | 0.80(0.43-1.48)   | 0.47   |
| Arteriole narrowing, n (%) total                   | 34 (1.3%), 2531    | 19 (2.2%), 874   | 53 (1.6%), 3405    | 1.63(0.91-2.91)   | 0.1    |
| Venule narrowing, n (%) total                      | 33 (1.3%), 2532    | 17 (1.9%), 875   | 50 (1.5%), 3407    | 1.50(0.83-2.70)   | 0.18   |
| Baring of the lamina cribrosa, n (%) total         | 1660 (66.1%), 2513 | 690 (79.8%), 865 | 2350 (69.6%), 3378 | 2.03(1.65-2.48)   | <0.001 |
| Vessel bayonetting, n (%) total                    | 701 (28.6%), 2452  | 459 (54.4%), 843 | 1160 (35.2%), 3295 | 2.99(2.52-3.54)   | <0.001 |
| Nasalization of the vessels, n (%) total           | 753 (29.8%), 2530  | 551 (63.2%), 872 | 1304 (38.3%), 3402 | 4.05(3.38-4.86)   | <0.001 |
| Cilioretinal vessels, n (%) total                  | 566 (22.4%), 2527  | 169 (19.4%), 873 | 735 (21.6%), 3400  | 0.83(0.68-1.02)   | 0.08   |
| Gray crescent, n (%) total                         | 235 (9.3%), 2535   | 72 (8.2%), 880   | 307 (9.0%), 3415   | 0.87(0.64-1.19)   | 0.39   |
| Pallor of disc, n (%) total                        | 29 (1.1%), 2535    | 108 (12.3%), 878 | 137 (4.0%), 3413   | 12.12(7.72-19.03) | <0.001 |
| Visible pores in lamina cribrosa, n (%) total      | 1414 (57.5%), 2458 | 654 (77.8%), 841 | 2068 (62.7%), 3299 | 2.58(2.10-3.17)   | <0.001 |

### Supplemental Table S3

Univariate analysis of phenotypic characteristics between eyes with and without LCDR.

| Characteristic                                | Not Extreme CDR    | Extreme CDR        | Total              | Odds Ratio (95% CI) | P-value |
|-----------------------------------------------|--------------------|--------------------|--------------------|---------------------|---------|
| Central corneal thickness (μm), mean (SD), N  | 536.7 (39.2), 3843 | 527.4 (39.9), 1321 | 534.3 (39.6), 5164 | 1.01(1.00-1.01)     | <0.001  |
| Intra-ocular pressure (mmHg), mean (SD), N    | 23.6 (7.2), 4156   | 29.1 (11.4), 1438  | 25.0 (8.8), 5594   | 1.07(1.06-1.08)     | <0.001  |
| Mean deviation (dB), mean (SD), N             | -4.1 (6.0), 3210   | -14.7 (10.9), 1003 | -6.6 (8.7), 4213   | 1.163(1.15-1.18)    | <0.001  |
| Pattern standard deviation (dB), mean (SD), N | 5.2 (3.3), 3217    | 7.9 (3.7), 1004    | 5.9 (3.6), 4221    | 1.23(1.20-1.25)     | <0.001  |
| RNFL (μm), mean (SD), N                       | 79.0 (15.3), 3311  | 63.7 (14.1), 959   | 75.6 (16.3), 4270  | 1.10(1.09-1.11)     | <0.001  |

|                                                 |                 |                 |                 |                 |        |
|-------------------------------------------------|-----------------|-----------------|-----------------|-----------------|--------|
| Visual acuity (corrected, logMAR), mean (SD), N | 0.4 (0.5), 3677 | 1.1 (1.4), 1254 | 0.6 (0.9), 4931 | 2.67(2.34-3.06) | <0.001 |
|-------------------------------------------------|-----------------|-----------------|-----------------|-----------------|--------|

#### Supplemental Table S4

Univariable analysis for comparison of demographic characteristics between non-blind eyes vs. blind eyes among LCDR eyes.

| Characteristic             | Not blind (n=877 eyes) | Blind (n=377 eyes) | Total         | Odds Ratio (95% Confidence Interval) | P-value |
|----------------------------|------------------------|--------------------|---------------|--------------------------------------|---------|
| Age, mean (SD), years      | 70.6 (12.1)            | 72.0 (11.6)        | 71.0 (11.9)   | 1.10(0.99-1.23)                      | 0.08    |
| Age group                  |                        |                    |               |                                      |         |
| <60                        | 160 (71.4%)            | 64 (28.6%)         | 224 (18.7%)   | Ref                                  | 0.12    |
| [60,70]                    | 218 (74.4%)            | 75 (25.6%)         | 293 (24.4%)   | 1.31(0.88-1.95)                      |         |
| [70,80]                    | 240 (67.8%)            | 114 (32.2%)        | 354 (29.5%)   | 0.86(0.57-1.31)                      |         |
| >=80                       | 216 (65.7%)            | 113 (34.3%)        | 329 (27.4%)   | 1.19(0.80-1.76)                      |         |
| Gender                     |                        |                    |               |                                      |         |
| Male                       | 483 (55.1%)            | 212 (56.2%)        | 695 (55.4%)   | Ref                                  | 0.72    |
| Female                     | 394 (44.9%)            | 165 (43.8%)        | 559 (44.6%)   | 0.95(0.74-1.24)                      |         |
| BMI, mean (SD)             | 28.8 (6.4)             | 28.3 (6.9)         | 28.6 (6.5)    | 1.0(1.0-1.0)                         | 0.30    |
| Diabetes                   | 292 (35.4%)            | 130 (36.3%)        | 422 (35.6%)   | 1.04(0.79-1.37)                      | 0.77    |
| Hypertension               | 637 (76.9%)            | 284 (78.9%)        | 921 (77.5%)   | 1.12(0.81-1.55)                      | 0.49    |
| Family history of glaucoma | 436 (58.0%)            | 208 (61.9%)        | 644 (59.2%)   | 1.18(0.89-1.55)                      | 0.25    |
| Previous glaucoma surgery  | 350 (42.6%)            | 206 (58.4%)        | 556 (47.3%)   | 1.89(1.44-2.48)                      | <0.001  |
| Tobacco use                | 430 (53.0%)            | 217 (61.0%)        | 647 (55.4%)   | 1.38(1.06-1.81)                      | 0.02    |
| Alcohol use                | 397 (49.2%)            | 145 (40.8%)        | 542 (46.6%)   | 0.71(0.55-0.93)                      | 0.01    |
| Ancestry (q0), mean (SD)   | 0.377 (0.298)          | 0.306 (0.263)      | 0.357 (0.290) | 0.91(0.87-0.96)                      | <0.001  |

#### Supplemental Table S5

Univariable analysis for comparison of optic disc characteristics between non-blind eyes vs. blind eyes among LCDR eyes.

| Characteristic                    | Not blind (n=604) | Blind (n=235 eyes) | Total       | Odds Ratio (95% Confidence Interval) | P-value |
|-----------------------------------|-------------------|--------------------|-------------|--------------------------------------|---------|
| Disc shape, n (%)                 |                   |                    |             |                                      |         |
| Round                             | 263 (43.5%)       | 108 (46.0%)        | 371 (44.1%) | Ref                                  | 0.54    |
| Oval                              | 341 (56.5%)       | 127 (54.0%)        | 468 (55.8%) | 0.91(0.67-1.24)                      |         |
| Shape of cup, n (%):              |                   |                    |             |                                      |         |
| Conical                           | 180 (31.1%)       | 85 (39.5%)         | 265 (33.3%) | Ref                                  | 0.03    |
| Cylindrical                       | 215 (37.2%)       | 59 (27.4%)         | 274 (34.6%) | 0.58(0.39-0.86)                      |         |
| Bean Pot                          | 183 (31.7%)       | 71 (33.0%)         | 254 (32.0%) | 0.82(0.56-1.21)                      |         |
| Beta peripapillary atrophy, n (%) | 119 (19.7%)       | 64 (29.2%)         | 183 (22.3%) | 1.68(1.16-2.43)                      | 0.006   |

|                                              |             |             |             |                 |       |
|----------------------------------------------|-------------|-------------|-------------|-----------------|-------|
| Stereoscopically identified disc tilt, n (%) | 45 (7.5%)   | 23 (10.2%)  | 68 (8.3%)   | 1.40(0.79-2.49) | 0.25  |
| Disc hemorrhage, n (%)                       | 9 (1.5%)    | 4 (1.8%)    | 13 (1.6%)   | 1.19(0.36-3.88) | 0.78  |
| Arteriole narrowing, n (%)                   | 17 (2.8%)   | 2 (0.9%)    | 19 (2.3%)   | 0.31(0.07-1.33) | 0.11  |
| Venule narrowing, n (%)                      | 8 (1.3%)    | 9 (4.0%)    | 17 (2.0%)   | 3.07(1.17-8.06) | 0.02  |
| Baring of the lamina cribrosa, n (%)         | 483 (80.9%) | 169 (75.8%) | 652 (79.5%) | 0.74(0.51-1.07) | 0.11  |
| Vessel bayonetting, n (%)                    | 330 (56.5%) | 105 (48.6%) | 435 (54.4%) | 0.73(0.53-1.00) | 0.053 |
| Nasalization of the vessels, n (%)           | 387 (64.4%) | 135 (59.7%) | 522 (63.1%) | 0.82(0.60-1.13) | 0.23  |
| Cilio retinal vessels, n (%)                 | 120 (19.9%) | 35 (15.6%)  | 155 (18.7%) | 0.74(0.49-1.13) | 0.16  |
| Gray crescent, n (%)                         | 53 (8.7%)   | 12 (5.2%)   | 65 (7.8%)   | 0.58(0.28-1.17) | 0.13  |
| Pallor of disc, n (%)                        | 62 (10.2%)  | 39 (17.2%)  | 101 (12.1%) | 1.82(1.17-2.83) | 0.008 |
| Visible pores in lamina cribrosa, n (%)      | 465 (79.8%) | 152 (71.0%) | 617 (77.4%) | 0.62(0.43-0.90) | 0.01  |

### Supplemental Table S6

Univariable analysis for comparison of phenotypic characteristics between non-blind eyes vs. blind eyes among LCDR eyes.

| Characteristic                                | Normal            | Impaired or worse | Total              | Odds Ratio (95% Confidence Interval) | P-value |
|-----------------------------------------------|-------------------|-------------------|--------------------|--------------------------------------|---------|
| Central Corneal Thickness (μm), mean (SD), N  | 526.1 (38.1), 814 | 522.8 (38.8), 349 | 525.1 (38.3), 1163 | 1.002(0.999-1.006)                   | 0.21    |
| Intra-Ocular Pressure (mmHg), mean (SD), N    | 27.2 (9.8), 877   | 34.2 (12.7), 377  | 29.3 (11.2), 1254  | 1.06(1.04-1.07)                      | <0.001  |
| Mean Deviation (dB), mean (SD), N             | -17.2 (9.6), 686  | -22.0 (9.5), 202  | -18.3 (9.8), 888   | 1.06(1.03-1.08)                      | <0.001  |
| Pattern Standard Deviation (dB), mean (SD), N | 8.1 (3.7), 685    | 7.0 (3.6), 203    | 7.9 (3.7), 888     | 0.92(0.88-0.96)                      | <0.001  |
| RNFL Thickness (μm), mean (SD), N             | 60.1 (11.4), 672  | 60.5 (12.5), 204  | 60.2 (11.7), 876   | 1.00(0.98-1.01)                      | 0.66    |
